# Supplementary material
Source: Springer Nature journal article supplement (https://www.springermedizin.de/resource/supplementary/12985_2014_2534_MOESM6_ESM.pdf/9606884)

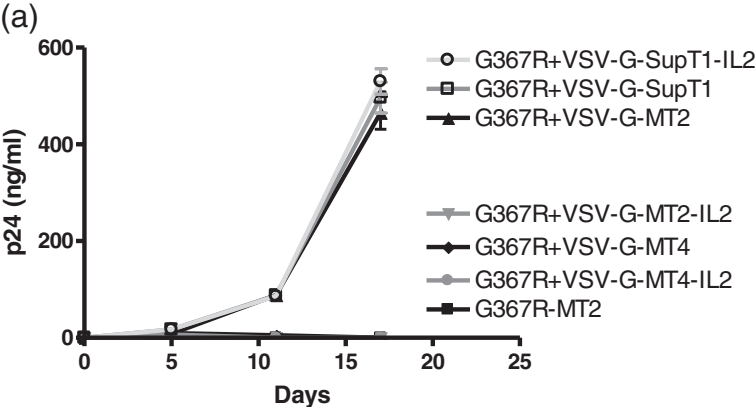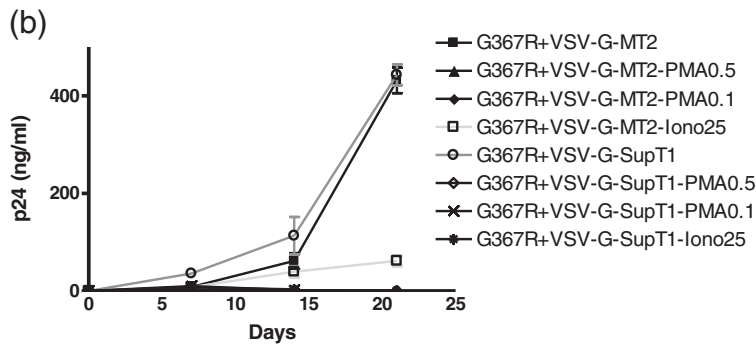

Supplement: MOESM6 [file 9606884]
